# Supplementary material for: Cation–π aggregation-induced white emission of moisture-resistant carbon quantum dots: a comprehensive spectroscopic study
Source: Royal Society of Chemistry journal article supplement (doi:10.1039/d2cp03388g), 2022-01-01
Supplement: d2cp03388g1.pdf [file d2cp03388g1.pdf]

# Cation- $\pi$ Aggregation-induced White Emission of Moisture-Resistant Carbon Quantum Dots: A Comprehensive Spectroscopic Study

Arman Ghasedi , Ehsan Koushki\* , Javad Baedi

*Department of Physics, Faculty of Sciences, Hakim Sabzevari University, Sabzevar, 96179-76487, Iran*

\* Corresponding author: E-mail: [ehsan.koushki@yahoo.com](mailto:ehsan.koushki@yahoo.com), [ehsan.koushki@hsu.ac.ir](mailto:ehsan.koushki@hsu.ac.ir), Tel: +985144013164 (E. Koushki)

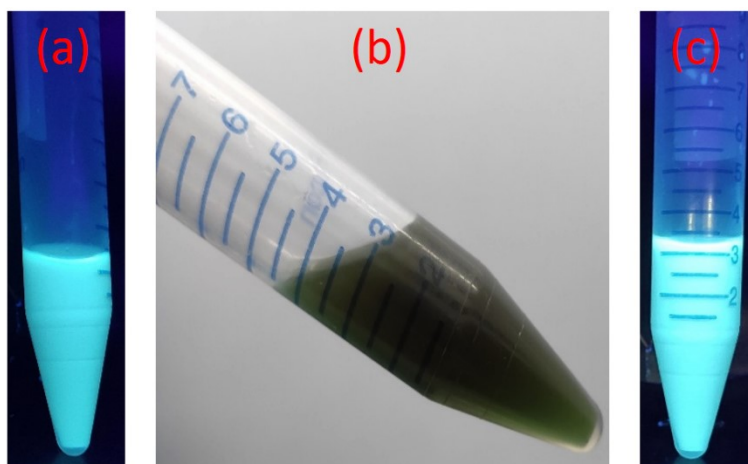

*Figure S1. B-CQDs sample before the addition of NaOH under Uv irradiation (a), after addition of NaOH in daylight (b), and blue emission resulted upon adding NaOH under Uv illumination (c).*

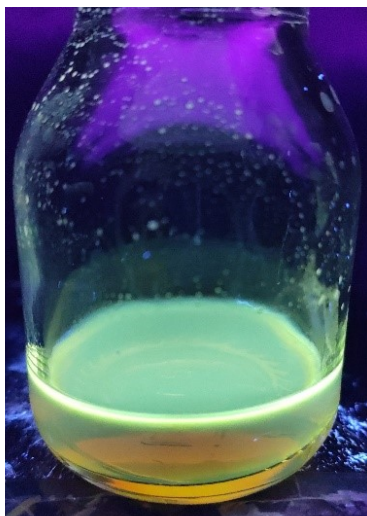

Figure S2. Light green emission from G-CQDs sample excited by 365 nm Uv lamp after the salting-out process.

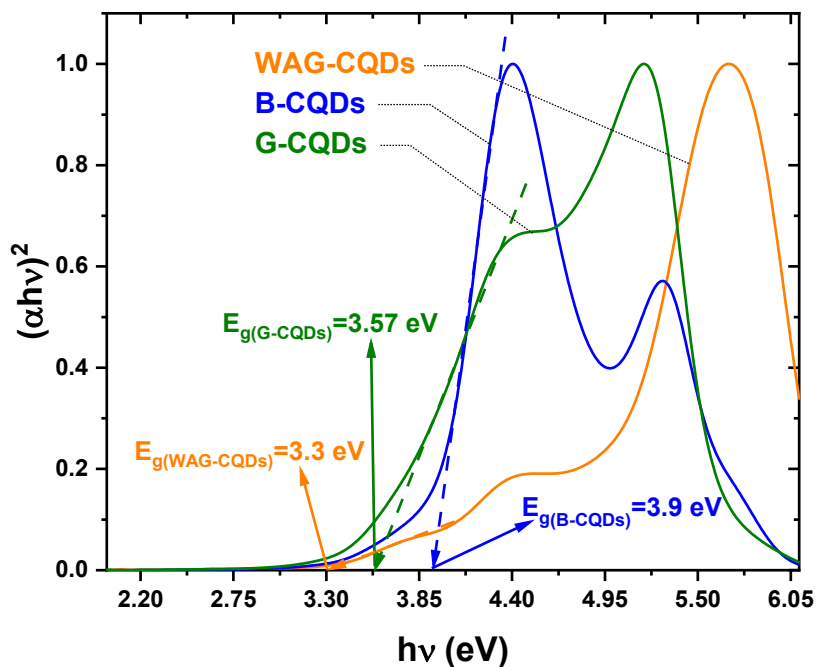

Figure S3. The calculated optical bandgap energies using Tauc's equation for WAG-, B-, and G-CQDs. The detail about the procedure of Tauc's equation implementation is presented below.

**Tauc plot:** The absorption coefficient ( $\alpha$ ) is related to photon energy ( $h\nu$ ) by:

$$(\alpha h\nu)^{1/m} = \beta(h\nu - E_g)$$

where  $m$ ,  $\beta$ , and  $E_g$  are transition mode factor, the band tailing parameter, and the energy of the optical bandgap. In the case of CQDs, the transition factor should be considered 1/2 due to direct gap nature of this material. According to Tauc's relation, plotting  $(\alpha h\nu)^2$  versus the photon energy ( $h\nu$ ) gives a straight line in a certain region. The extrapolation of this straight line will intercept the ( $h\nu$ ) axis to give the value of the indirect optical energy gap ( $E_g$ ).

Table S1. FTIR peak assignments

| Sample | Frequency (cm <sup>-1</sup> ) | Assigned vibration                                                                                                                     | Ref.       |
|--------|-------------------------------|----------------------------------------------------------------------------------------------------------------------------------------|------------|
| B-CQDs | 3490                          | $\nu$ C-OH, COOH and H <sub>2</sub> O                                                                                                  | [1, 2]     |
|        | 2930                          | $\nu_{as}$ C-H                                                                                                                         | [3]        |
|        | 1650                          | $\nu$ C=O: ketones and 1,3-benzoquinones                                                                                               | [1, 2]     |
|        | 1490-1580                     | $\nu_{as}$ C=C carboxylate                                                                                                             | [4]        |
|        | 1390                          | $\nu$ C-O                                                                                                                              | [1, 2]     |
|        | 1250                          | $\tau$ C-H (CH <sub>2</sub> twisting vibrations)/C-S and $\omega$ C-H (CH <sub>2</sub> wagging vibrations)                             | [5, 6]     |
|        | 1100                          | C-O axial stretching, alcohols                                                                                                         | [7]        |
|        | 1050                          | $\nu$ C-O                                                                                                                              | [8]        |
|        | 879                           | $\nu$ C-O-C                                                                                                                            | [9]        |
|        | 766                           | $\nu$ C-O: ethers and $\gamma$ -butyrolactones                                                                                         | [9]        |
|        | 661                           | $\nu$ C-H                                                                                                                              | [10]       |
| G-CQDs | 3520                          | $\nu$ C-OH, COOH and H <sub>2</sub> O                                                                                                  | [1, 2]     |
|        | 2970                          | $\nu_{as}$ C-H                                                                                                                         | [3]        |
|        | 1730                          | $\nu$ C=O: carboxyls (COOH) and/or scissor modes of H <sub>2</sub> O                                                                   | [1, 2]     |
|        | 1590                          | $\nu_{as}$ C=C: in-plane asymmetric stretching of $sp^2$ -hybridized C=C overlaps with C=O vibrations of ketones and 1,3-benzoquinones | [1]        |
|        | 1510                          | $\nu_{as}$ C=C                                                                                                                         | [1]        |
|        | 1370                          | $\nu$ C-O                                                                                                                              | [1, 2]     |
|        | 1260                          | $\tau$ C-H/C-S and $\omega$ C-H                                                                                                        | [5, 6]     |
|        | 1170                          | $\nu$ C-O stretching vibration                                                                                                         | [1, 2, 11] |
|        | 1090                          | $\nu$ C-C and $\rho$ C-H (CH <sub>2</sub> rocking vibrations)                                                                          | [6]        |
|        | 1040                          | $\nu$ C-O                                                                                                                              | [8]        |
|        | 926                           | $\rho$ C-H and $\nu$ C-C                                                                                                               | [6]        |
| 879    | $\nu$ C-O-C                   | [9]                                                                                                                                    |            |

|                 |      |                                                                                                                                        |            |
|-----------------|------|----------------------------------------------------------------------------------------------------------------------------------------|------------|
|                 | 835  | $\nu$ C-O-C                                                                                                                            | [9]        |
|                 | 756  | $\nu$ C-O: ethers and $\gamma$ -butyrolactones                                                                                         | [9]        |
|                 | 692  | $\nu$ C-O: mostly $\gamma$ -butyrolactones groups                                                                                      | [9]        |
|                 | 580  | $\nu$ C-H                                                                                                                              | [10]       |
|                 | 538  | $\nu$ C-H                                                                                                                              | [12]       |
| <b>WAG-CQDs</b> | 3370 | $\nu$ C-OH, COOH and H <sub>2</sub> O                                                                                                  | [1, 2]     |
|                 | 1740 | $\nu$ C=O: carboxyls (COOH) and/or scissor modes of H <sub>2</sub> O                                                                   | [1, 2]     |
|                 | 1610 | $\nu$ C=O                                                                                                                              | [1, 9]     |
|                 | 1590 | $\nu_{as}$ C=C: in-plane asymmetric stretching of $sp^2$ -hybridized C=C overlaps with C=O vibrations of ketones and 1,3-benzoquinones | [1]        |
|                 | 1510 | $\nu_{as}$ C=C                                                                                                                         | [1]        |
|                 | 1470 | $\nu_{as}$ C=C: in-plane asymmetric stretching of $sp^2$ -hybridized C=C overlaps with C=O vibrations of ketones and 1,3-benzoquinones | [1]        |
|                 | 1260 | $\tau$ C-H/C-S and $\omega$ C-H                                                                                                        | [5, 6]     |
|                 | 1170 | $\nu$ C-O stretching vibration                                                                                                         | [1, 2, 11] |
|                 | 1120 | $\tau$ C-H and $\omega$ C-H                                                                                                            | [5, 6]     |
|                 | 1020 | $\nu$ C-O, $\nu$ C-C and $\rho$ C-H                                                                                                    | [1, 2]     |
|                 | 928  | $\rho$ C-H and $\nu$ C-C                                                                                                               | [6]        |
|                 | 835  | $\nu$ -O-: edge groups                                                                                                                 | [9]        |
|                 | 756  | $\nu$ C-O: ethers and $\gamma$ -butyrolactones                                                                                         | [9]        |
|                 | 729  | $\nu$ C-O: mostly ethers                                                                                                               | [9]        |
|                 | 694  | $\nu$ C-O: ethers and $\gamma$ -butyrolactones                                                                                         | [9]        |
|                 | 584  | $\nu$ C-H                                                                                                                              | [10]       |

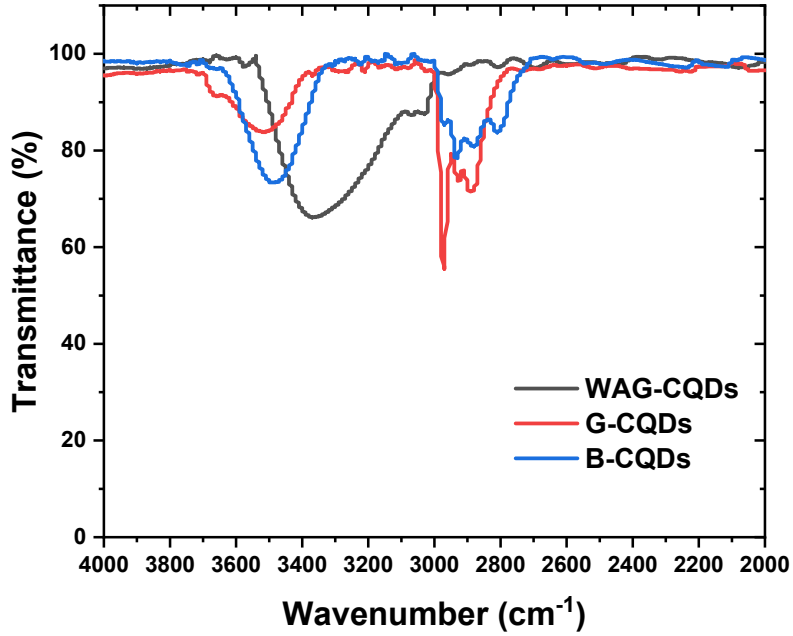

Figure S4. -OH band shift through aggregation.

Table S2. Characteristics and peak assignments of fitted Raman bands Ref. [13].

| Sample                 | Raman bands (cm <sup>-1</sup> )                         |                   |                             |             |      |                        | Intensity ratios  |                      |                      |                      |                      |
|------------------------|---------------------------------------------------------|-------------------|-----------------------------|-------------|------|------------------------|-------------------|----------------------|----------------------|----------------------|----------------------|
|                        | D1                                                      | D2                | D                           | D3          | G    | D'                     | $\frac{I_D}{I_G}$ | $\frac{I_{D1}}{I_G}$ | $\frac{I_{D2}}{I_G}$ | $\frac{I_{D3}}{I_G}$ | $\frac{I_{D'}}{I_G}$ |
| <b>B-CQDs</b>          | -                                                       | 1276              | 1357                        | 1517        | 1595 | 1735                   | 1.31              | -                    | 0.61                 | 0.68                 | 0.15                 |
| <b>G-CQDs</b>          | 1125                                                    | 1263              | 1370                        | 1513        | 1591 | 1677                   | 1.81              | 0.41                 | 0.93                 | 0.65                 | 0.05                 |
| <b>WAG-CQDs</b>        | 1113                                                    | 1230              | 1307                        | 1471        | 1600 | 1674                   | 1.99              | 0.77                 | 0.27                 | 0.87                 | 1.14                 |
| <b>Peak assignment</b> | sp <sup>2</sup> -sp <sup>3</sup> carbon domains/<br>C-S | COOH/C<br>-OH/S-O | Zig-zag/armch<br>air states | C=O/<br>C-O | C=C  | Crystalline<br>defects |                   |                      |                      |                      |                      |

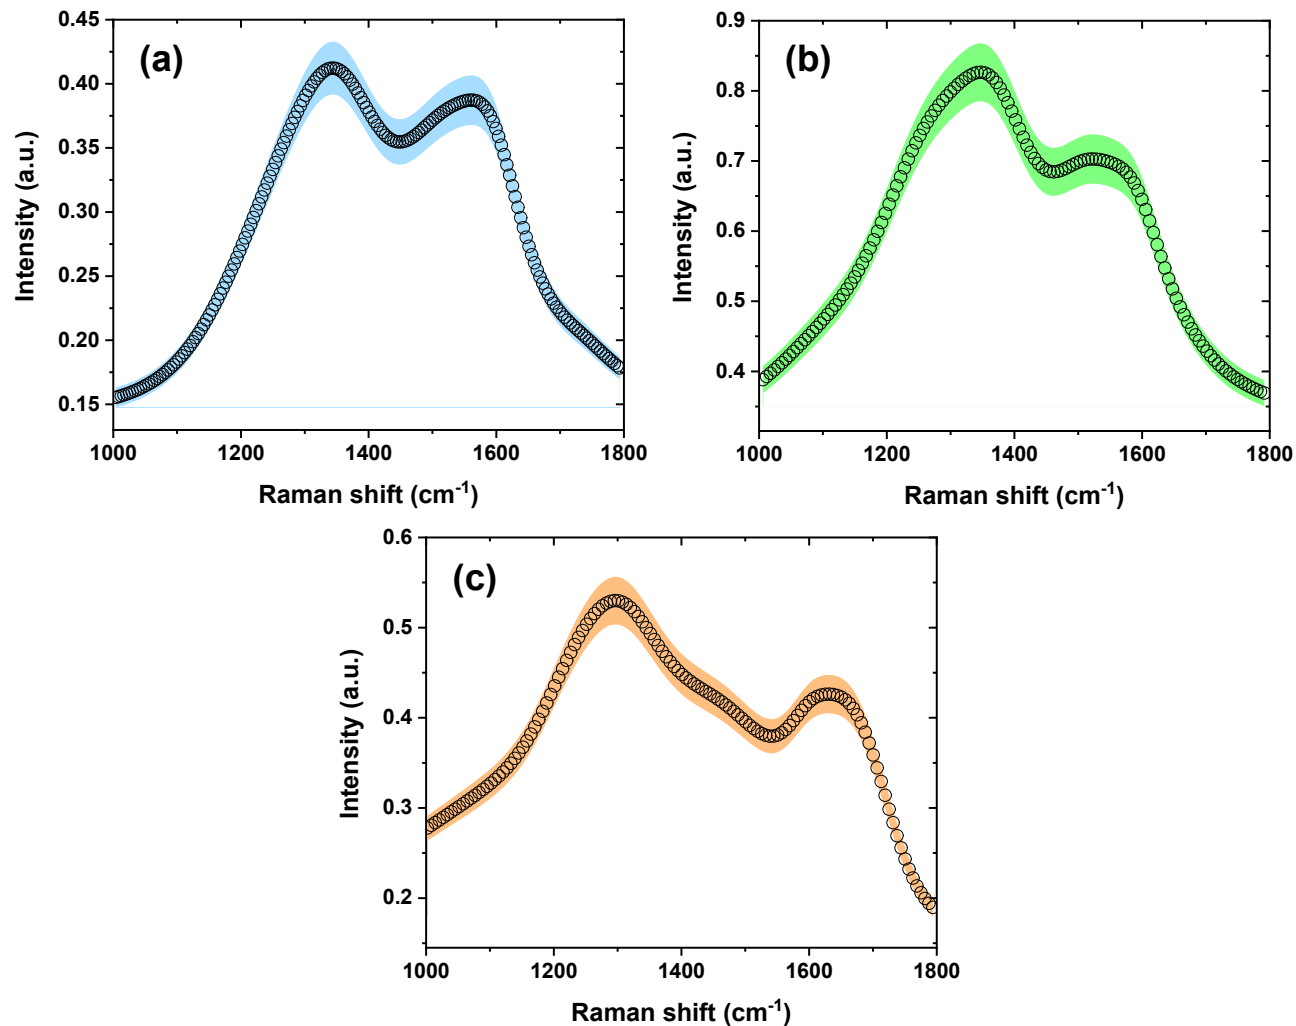

Figure S5. Calculated error bars (highlighted regions) for Raman spectra of B-CQDs (a), G-CQDs (b), and WAG-CQDs (c).

Table S3. The parameters and peak assignments of the deconvoluted PL peaks Ref. [13].

| Sample<br>( $\lambda_{\text{ex}}=365$ nm) | Peak position (nm)    |                             |       |                                               |           |         |                          |
|-------------------------------------------|-----------------------|-----------------------------|-------|-----------------------------------------------|-----------|---------|--------------------------|
|                                           | P'                    | P0                          | P1    | P2                                            | P3        | P4      | P5                       |
| B-CQDs                                    | -                     | -                           | 422   | 458                                           | -         | -       | 621                      |
| G-CQDs                                    | -                     | -                           | 422   | 464                                           | 498       | 527     | 589                      |
| WAG-CQDs                                  | 367                   | 416                         | 431   | 446                                           | -         | -       | 618                      |
| Origin of the emissions                   | Intrinsic C emissions | C(=O)OH/zig-zag edge states | C-O-C | Armchair edge states/S containing doped sites | COOH/C-OH | C=O/C-O | Defect related emissions |

Table S4. characteristics and peak assignments of the deconvoluted PL peaks of WAG-CQDs sample under different excitation wavelengths. Ref. [11, 13].

| sample                                | Peak position (nm)    |                                    |       |                                                        |               |             |                                |
|---------------------------------------|-----------------------|------------------------------------|-------|--------------------------------------------------------|---------------|-------------|--------------------------------|
|                                       | P'                    | P0                                 | P1    | P2                                                     | P3            | P4          | P5                             |
| <b>WAG-CQDs</b><br>$\lambda_{ex}=300$ | -                     | 407                                | 437   | 455                                                    | -             | -           | 620                            |
| <b>WAG-CQDs</b><br>$\lambda_{ex}=365$ | 367                   | 416                                | 431   | 431                                                    | -             | -           | 618                            |
| <b>WAG-CQDs</b><br>$\lambda_{ex}=400$ | 367                   | 416                                | -     | 446                                                    | 482           | -           | 590                            |
| <b>WAG-CQDs</b><br>$\lambda_{ex}=420$ | -                     | 403                                | 429   | 459                                                    | 496           | 527         | 588                            |
| <b>Origin of the emissions</b>        | Intrinsic C emissions | C(=O)OH/<br>zig-zag<br>edge states | C-O-C | Armchair edge<br>states/S<br>containing<br>doped sites | COOH/C<br>-OH | C=O/C<br>-O | Defect<br>related<br>emissions |

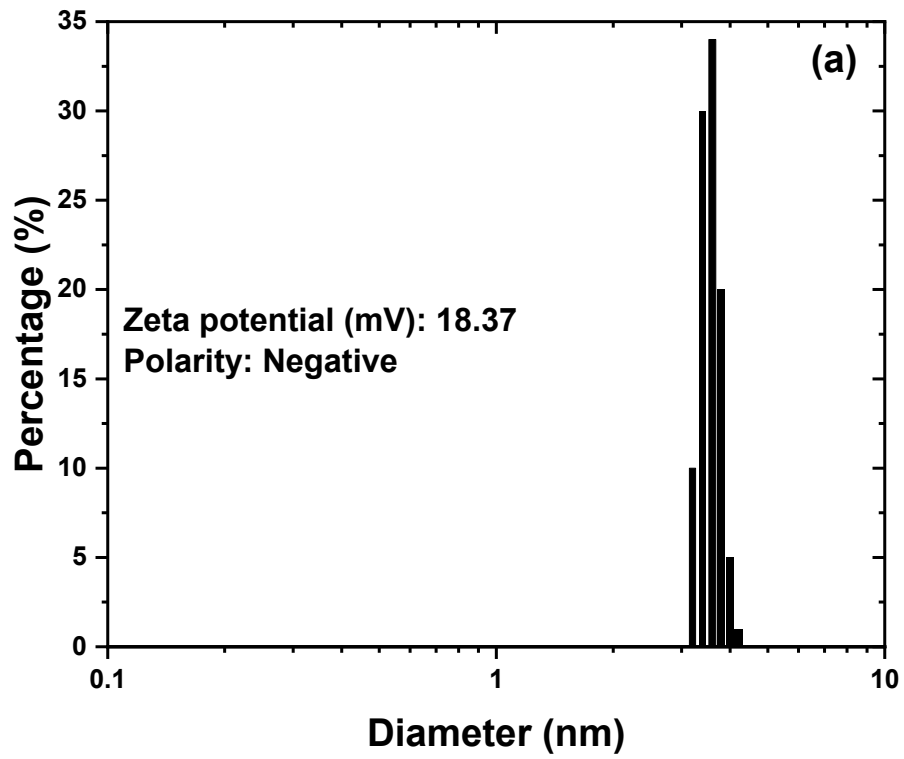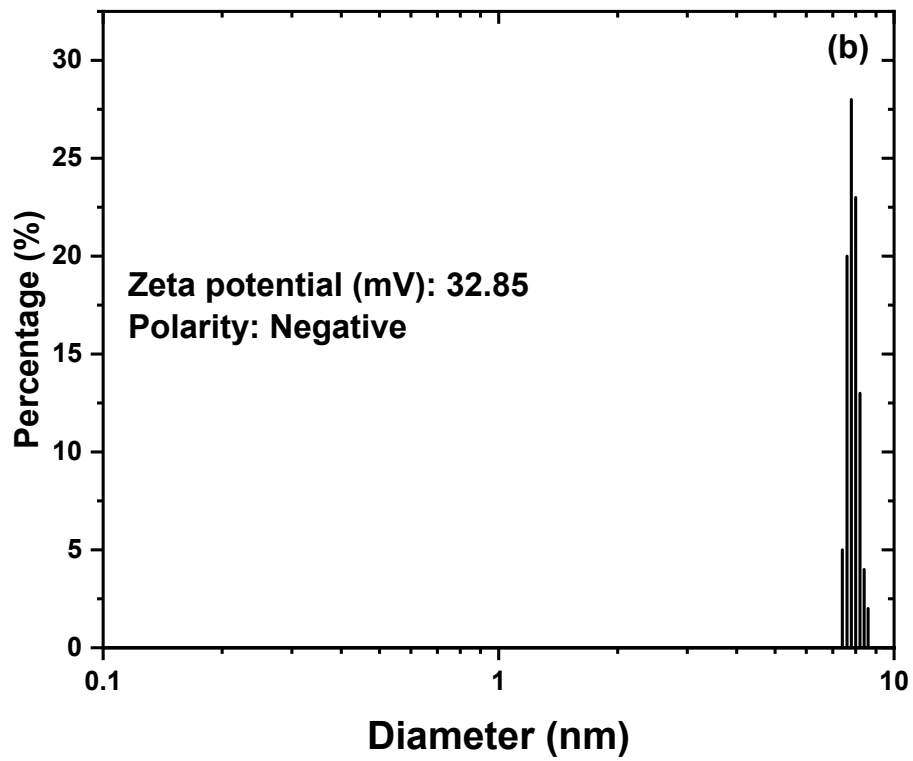



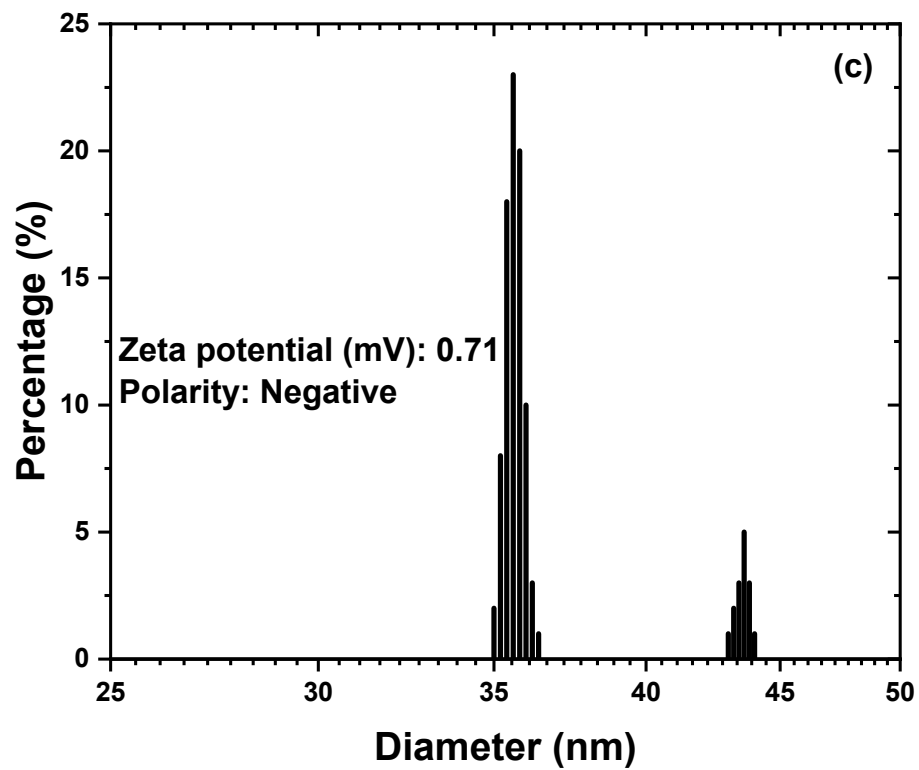

Figure S6. DLS analysis results for a) B-CQDs, b) G-CQDs, and c) WAG-CQDs, respectively.

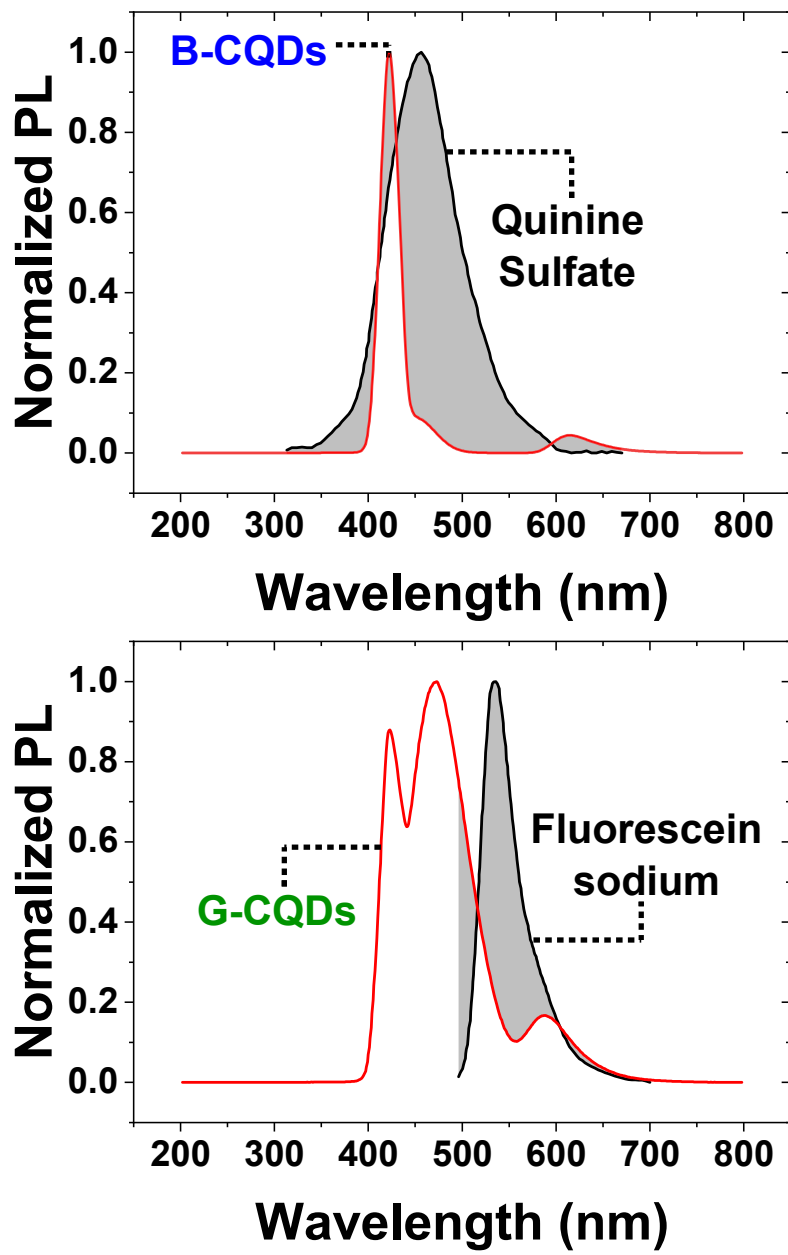

Figure S7. Normalized PL results to calculate PLQYs utilizing quinine sulfate and fluorescein sodium as the references.

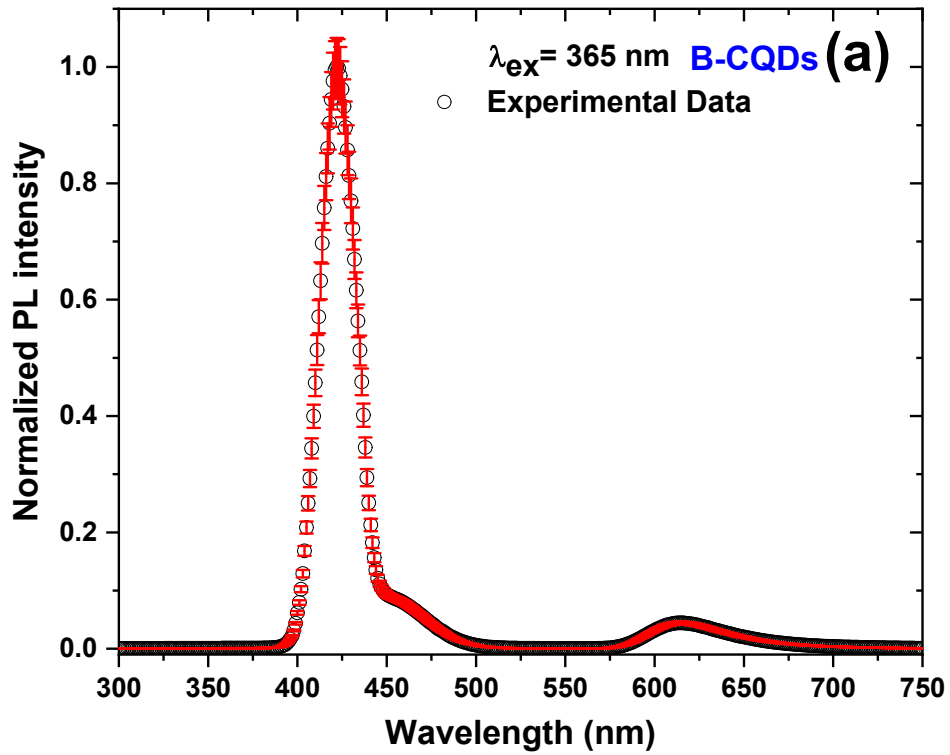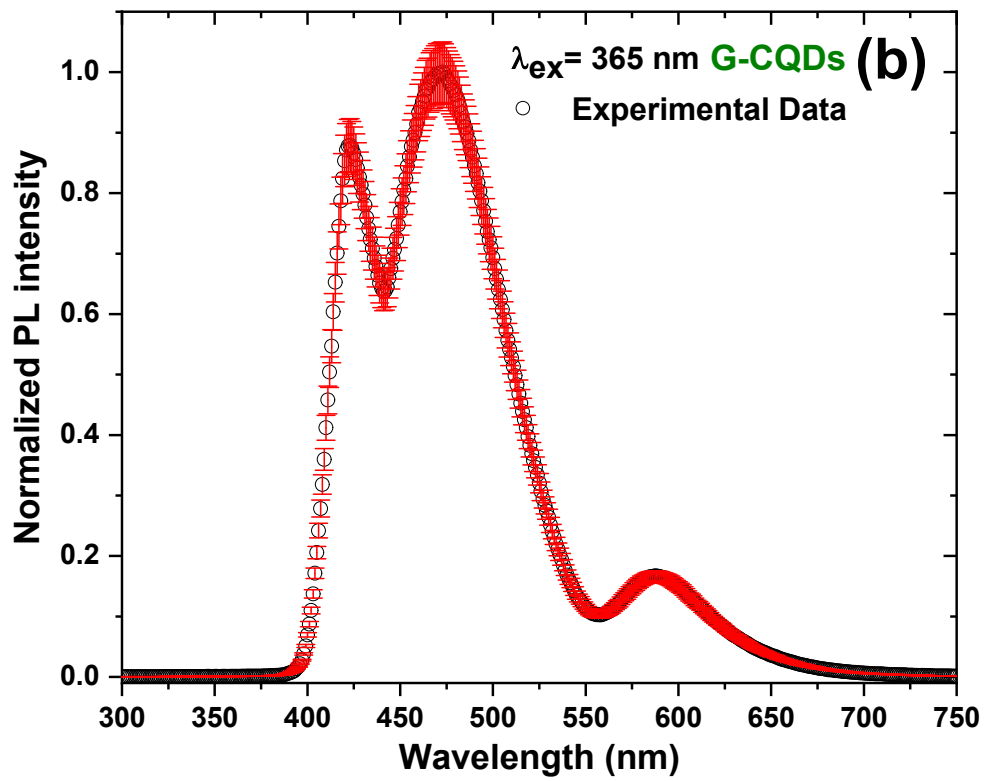

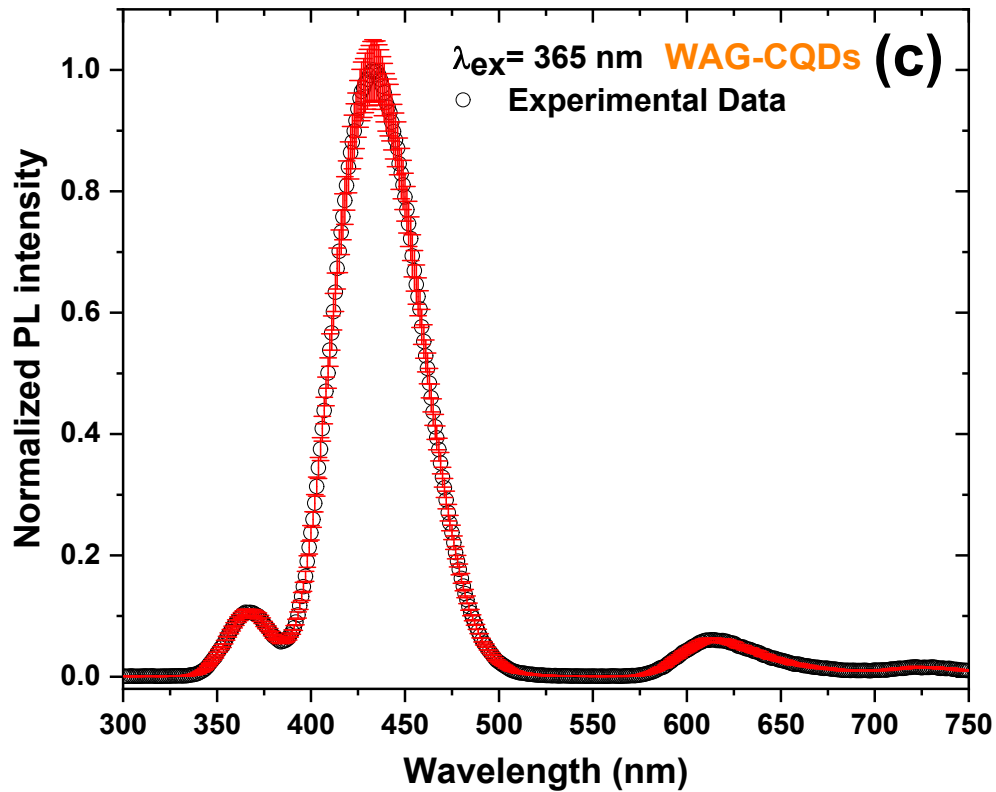

Figure S8. Calculated error bars for PL spectra of B-CQDs (a), G-CQDs (b), and WAG-CQDs (c)

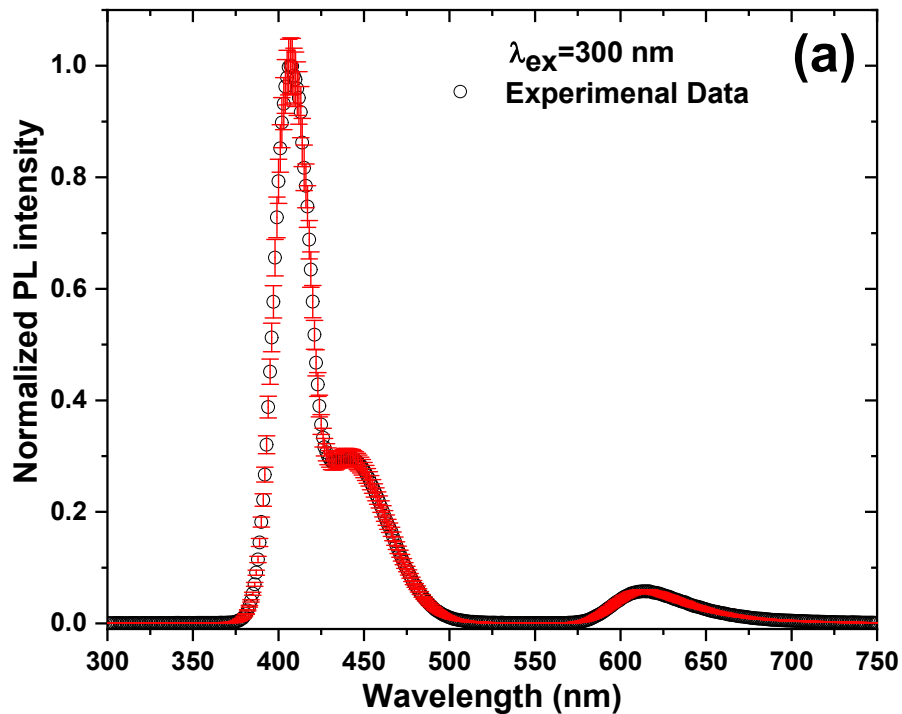

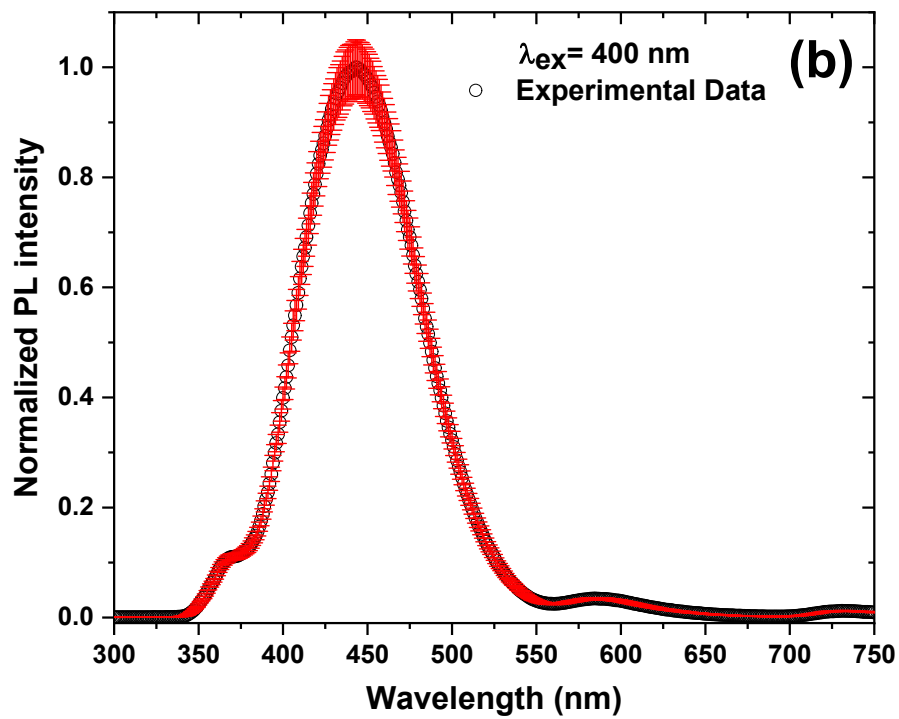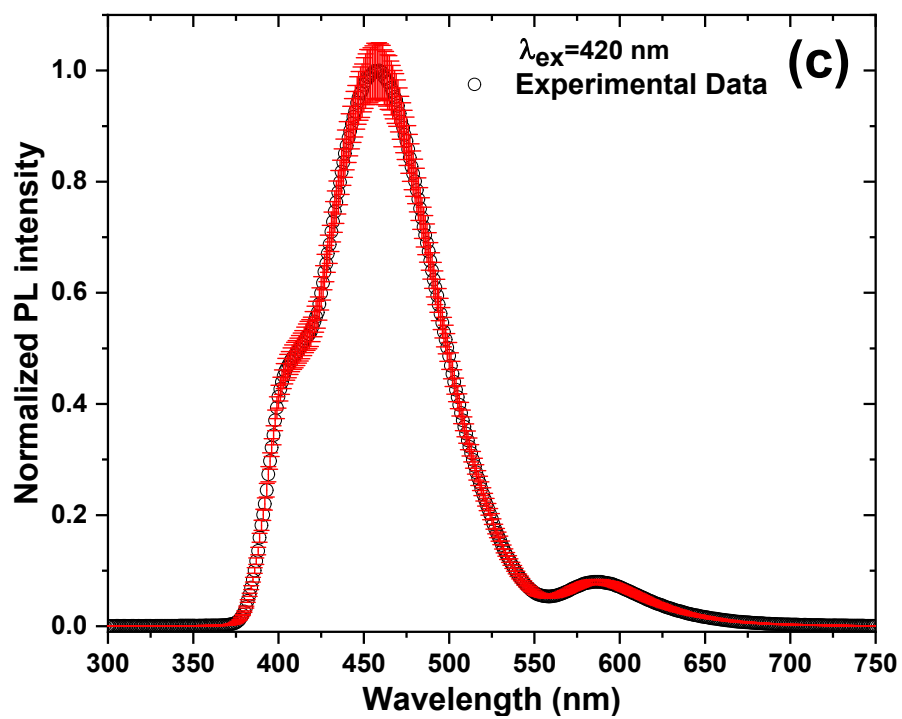

Figure S9. Calculated error bars for PL spectra of WAG-CQDs under 300nm (a), 365nm (b), 400nm (c), and 420nm (d) UV irradiation.

## Reference

- [1] M. Acik, G. Lee, C. Mattevi, A. Pirkle, R.M. Wallace, M. Chhowalla, K. Cho, Y. Chabal, The Role of Oxygen during Thermal Reduction of Graphene Oxide Studied by Infrared Absorption Spectroscopy, *The Journal of Physical Chemistry C*, 115 (2011) 19761-19781.
- [2] A. Allahbakhsh, A.R. Bahramian, Self-assembly of graphene quantum dots into hydrogels and cryogels: Dynamic light scattering, UV–Vis spectroscopy and structural investigations, *J. Mol. Liq.*, 265 (2018) 172-180.
- [3] A. Allahbakhsh, F. Noei Khodabadi, F.S. Hosseini, A.H. Haghighi, 3-Aminopropyl-triethoxysilane-functionalized rice husk and rice husk ash reinforced polyamide 6/graphene oxide sustainable nanocomposites, *European Polymer Journal*, 94 (2017) 417-430.
- [4] G. Kaur, M. Chaudhary, K.C. Jena, N. Singh, Terbium(iii)-coated carbon quantum dots for the detection of clomipramine through aggregation-induced emission from the analyte, *New J. Chem.*, 44 (2020) 10536-10544.
- [5] O. Masaru, S. Yuji, M. Hiromu, Molecular Vibrations and Force Fields of Alkyl Sulfides. IV. Infrared Spectra of Diethyl Sulfide, *Bulletin of the Chemical Society of Japan*, 45 (1972) 956-959.
- [6] H. Michiro, S. Yuji, M. Hiromu, Molecular Vibrations and Structures of Polyalkyl Polysulfides. II. Polyethylene Disulfide, *Bulletin of the Chemical Society of Japan*, 39 (1966) 1861-1866.
- [7] R. Souza da Costa, W. Ferreira da Cunha, N. Simenremis Pereira, A. Marti Ceschin, An Alternative Route to Obtain Carbon Quantum Dots from Photoluminescent Materials in Peat, *Materials (Basel)*, 11 (2018) 1492.
- [8] Z. Jiang, X. Zhao, Y. Fu, A. Manthiram, Composite membranes based on sulfonated poly(ether ether ketone) and SDBS-adsorbed graphene oxide for direct methanol fuel cells, *Journal of Materials Chemistry*, 22 (2012) 24862-24869.
- [9] M. Acik, G. Lee, C. Mattevi, M. Chhowalla, K. Cho, Y.J. Chabal, Unusual infrared-absorption mechanism in thermally reduced graphene oxide, *Nature Materials*, 9 (2010) 840-845.
- [10] A. Allahbakhsh, A.H. Haghighi, M. Sheydaei, Poly(ethylene trisulfide)/graphene oxide nanocomposites, *Journal of Thermal Analysis and Calorimetry*, 128 (2017) 427-442.
- [11] R. Das, S. Parveen, A. Bora, P.K. Giri, Origin of high photoluminescence yield and high SERS sensitivity of nitrogen-doped graphene quantum dots, *Carbon*, 160 (2020) 273-286.
- [12] B.A. Trofimov, L.M. Sinegovskaya, N.K. Gusarova, Vibrations of the S–S bond in elemental sulfur and organic polysulfides: a structural guide, *Journal of Sulfur Chemistry*, 30 (2009) 518-554.
- [13] G. Rajender, P.K. Giri, Formation mechanism of graphene quantum dots and their edge state conversion probed by photoluminescence and Raman spectroscopy, *J. Mater. Chem. C*, 4 (2016) 10852-10865.
